# Supplementary material
Source: PubMed Central journal article supplement (PMC2989431)

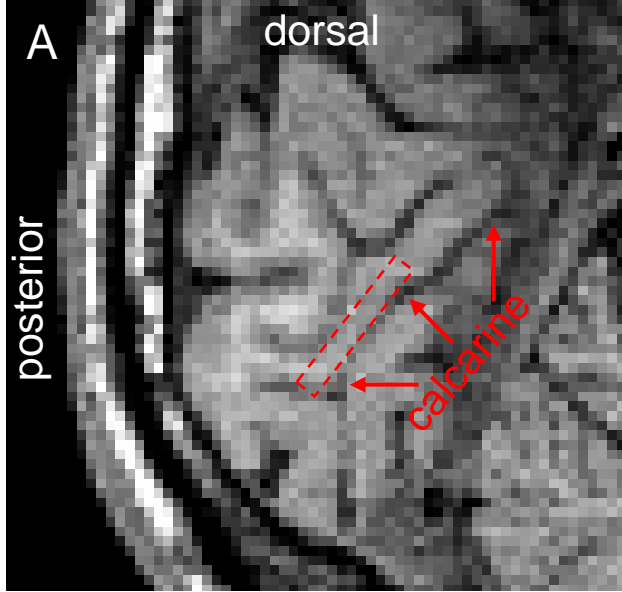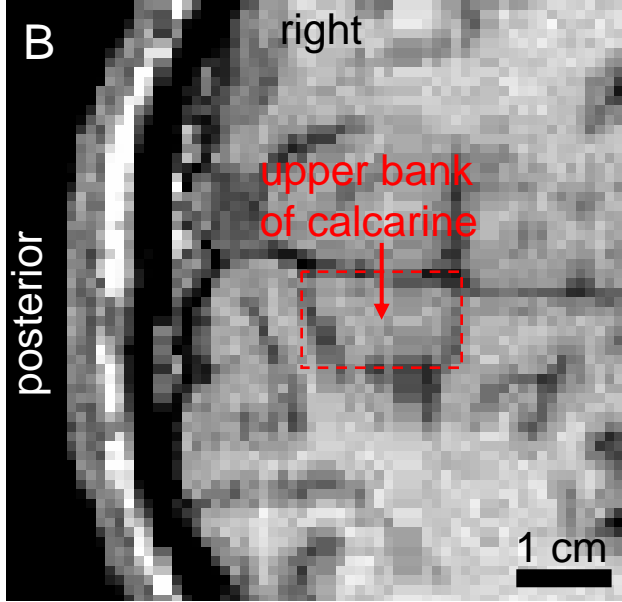

Suppl. Fig. 1

Supplement: NIHMS20632-supplement-02.pdf [file NIHMS20632-supplement-02.pdf]

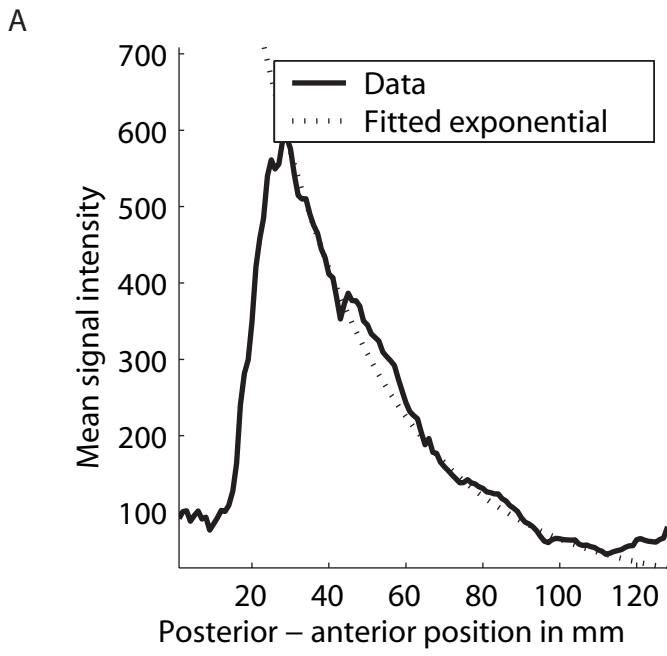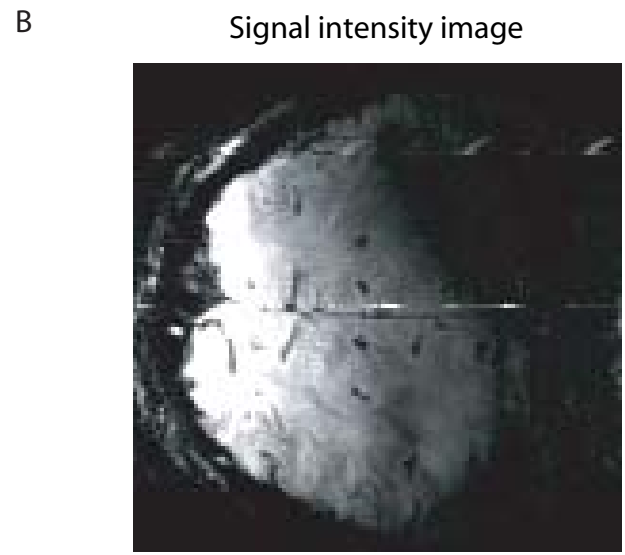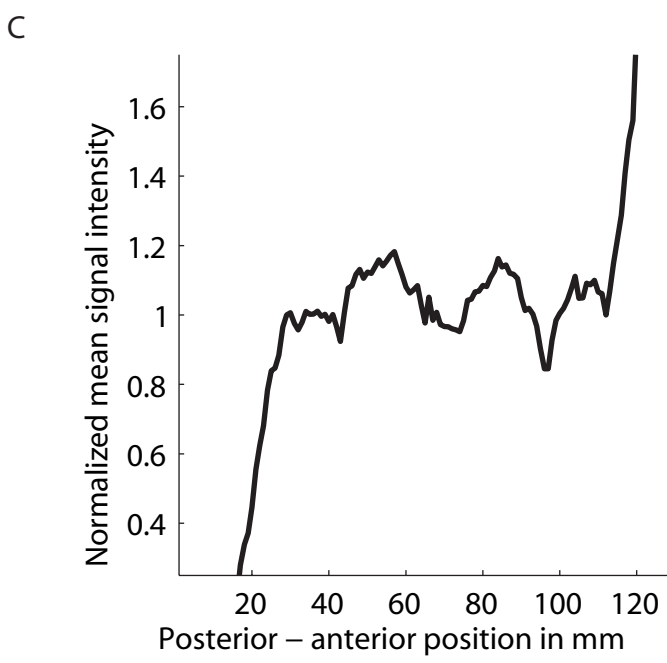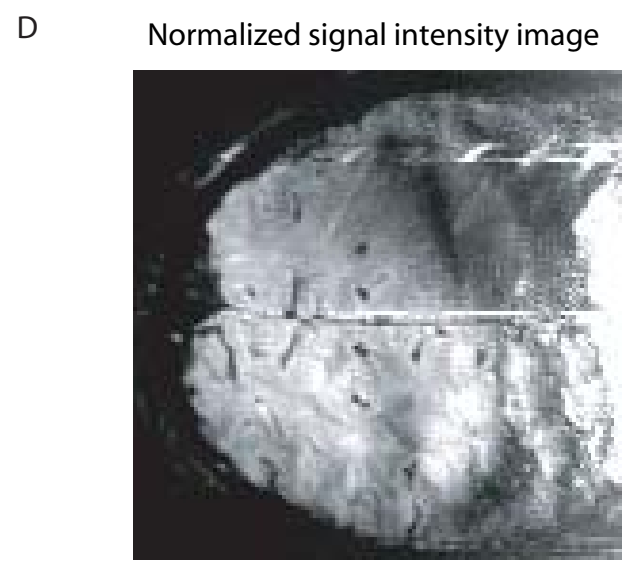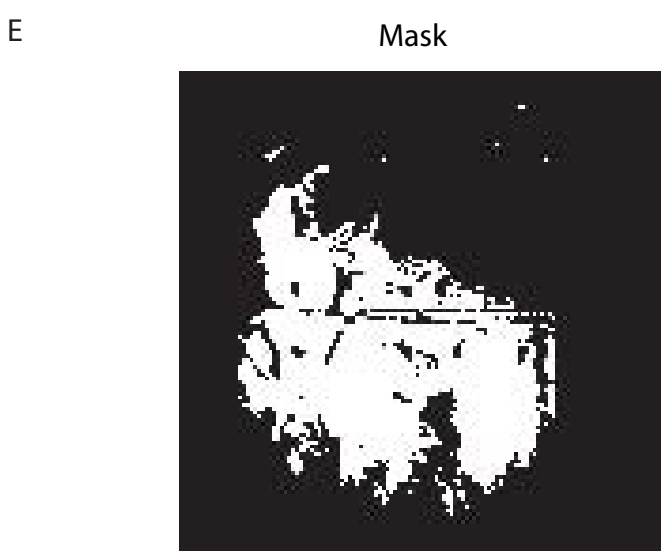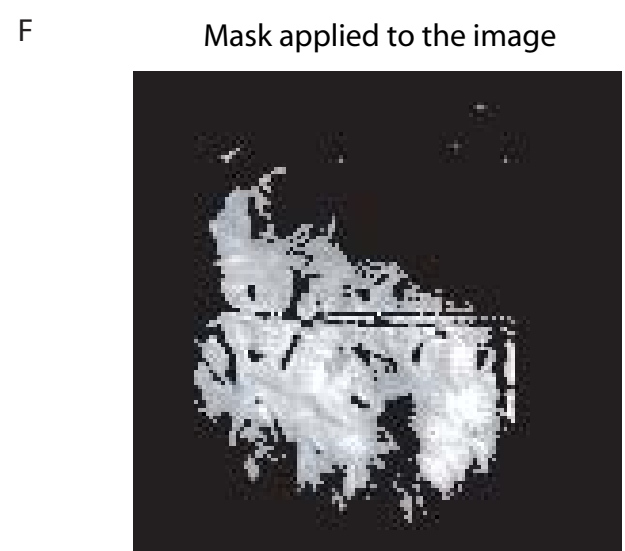

Suppl. Fig. 2

Supplement: NIHMS20632-supplement-03.pdf [file NIHMS20632-supplement-03.pdf]

Subject 1

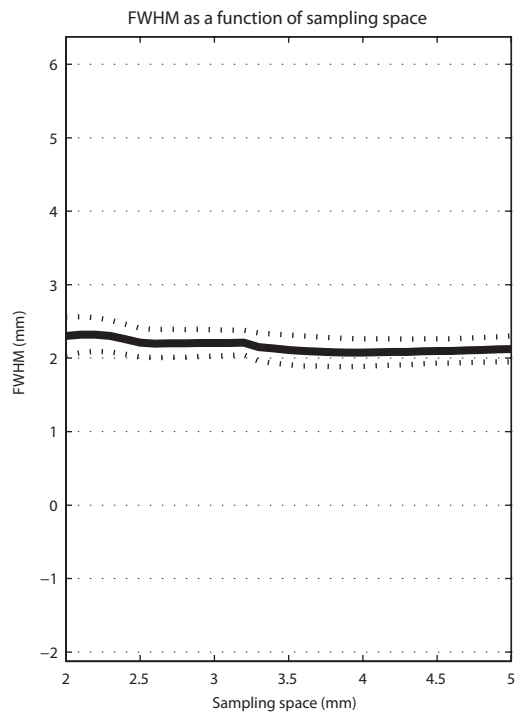

Subject 2

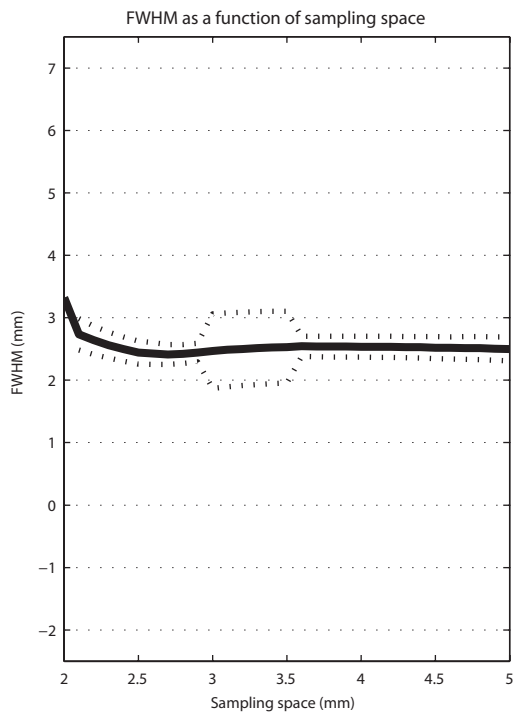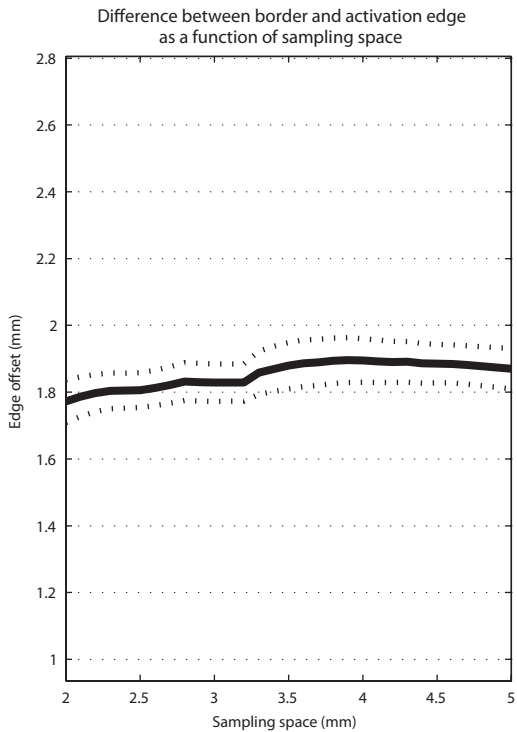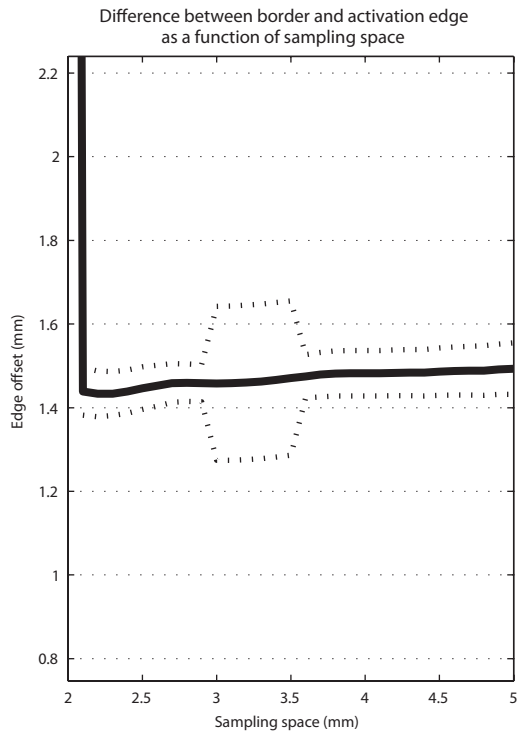

Supplement: NIHMS20632-supplement-04.pdf [file NIHMS20632-supplement-04.pdf]
